# Supplementary material for: Evolution of Metapostnotum in Flat Wasps (Hymenoptera, Bethylidae): Implications for Homology Assessments in Chrysidoidea
Source: PLoS One. 2015 Oct 14;10(10):e0140051. doi: 10.1371/journal.pone.0140051 (PMC4605639; doi:10.1371/journal.pone.0140051)
Supplement: S1 Table — (XLSX) [file pone.0140051.s001.xlsx]

## Sheet: Plan1
Table S1. Specimens dissected and deposition information for specimen data.
Family	Subfamily	Specimen	Collection	Locality
Bethylidae	Bethylinae	Prosierola sp.	UFES	Brazil: Espírito Santo: Guarapari: Parque Estadual Paulo Cesar Vinha
Bethylidae	Epyrinae	Clorepyris sp.	UFES	Australia: Western Australia: Mount Robinson
Bethylidae	Epyrinae	Epyris sp.	CASC	Madagascar: Antsiranana: Manantenina: Parc National de Marojejy
Bethylidae	Mesitiinae	Heterocoelia sp.	QSBG	Thailand: Chanthaburi: Khao Khitchakut National Park
Bethylidae	Pristocerinae	Pseudidobrachium sp.	CASC	Madagascar: Antsiranana: Manantenina: Parc National de Marojejy
Bethylidae	Pristocerinae	Pseudidobrachium sp.	UFES	Brazil: Espírito Santo: Ibitirama: Parque Nacional do Caparaó
Bethylidae	Pristocerinae	Pristocera sp.	CASC	Madagascar: Antsiranana: Manantenina: Parc National de Marojejy
Bethylidae	Scleroderminae	Sclerodermus sp.	QSBG	Thailand: Chanthaburi: Khao Khitchakut National Park
